# Supplementary material
Source: publisher figshare collection journal article supplement (https://geolsoc.figshare.com/articles/dataset/_/3453722)
Supplement: Supplementary file 2 [file 1]

**U-Pb zircon CA-ID-TIMS data table**

- (a) /1, /2 etc. are labels for the different single zircon grain analyses; all analyses were annealed and chemically abraded following a method modified after Mattinson (2005). Analyses shown in bold were used in the weighted mean  $^{206}\text{Pb}/^{238}\text{U}$  date calculations.
- (b) Nominal fraction weights measured after chemical abrasion. Weights that are shown in square brackets represent grains that were too small to be accurately weighed using the available balance. These weights may therefore be inaccurate.
- (c) Nominal U and total Pb concentrations subject to the uncertainty in zircon weights. Concentration values for grains too small to be weighed accurately are likely to be inaccurate.
- (d) Model Th/U ratio calculated from the radiogenic  $^{208}\text{Pb}/^{206}\text{Pb}$  ratio and  $^{206}\text{Pb}/^{238}\text{U}$  date.
- (e)  $\text{Pb}^*$  and  $\text{Pb}_c$  represent radiogenic and common Pb respectively.
- (f) Measured ratio corrected for tracer and fractionation only. Pb and U mass fractionation were controlled online using the  $^{202}\text{Pb}/^{205}\text{Pb}$  and  $^{233}\text{U}/^{235}\text{U}$  ratios of the EARTHTIME isotopic tracer respectively.
- (g) Corrected for fractionation, tracer, and common Pb. All common lead was attributed to the analytical blank and corrected using:  $^{206}\text{Pb}/^{204}\text{Pb} = 18.30 \pm 0.26$ ,  $^{207}\text{Pb}/^{204}\text{Pb} = 15.47 \pm 0.32$ ,  $^{208}\text{Pb}/^{204}\text{Pb} = 37.60 \pm 0.74$  (all uncertainties  $2\sigma$  absolute).  $^{206}\text{Pb}/^{238}\text{U}$  and  $^{207}\text{Pb}/^{206}\text{Pb}$  ratios corrected for initial disequilibrium in  $^{230}\text{Th}/^{238}\text{U}$  using Th/U [magma] of 4.
- (h) Error correlation between  $^{207}\text{Pb}/^{235}\text{U}$  and  $^{206}\text{Pb}/^{238}\text{U}$  ratios.
- (i) Calculations are based on the decay constants of Jaffey *et al.* (1971).  $^{206}\text{Pb}/^{238}\text{U}$  and  $^{207}\text{Pb}/^{206}\text{Pb}$  dates are corrected for initial disequilibrium in  $^{230}\text{Th}/^{238}\text{U}$  using Th/U [magma] of 4.
- (j) Date uncertainties are  $2\sigma$  absolute (Ma), propagated using the algorithms of Schmitz & Schoene (2007) and Crowley *et al.* (2007).
- (k) Discordance =  $100 - (100 \times (^{206}\text{Pb}/^{238}\text{U} \text{ date} / ^{207}\text{Pb}/^{206}\text{Pb} \text{ date}))$ .

| Sample ID                                           | Compositional Parameters |         |          |       |                             |                    | Radiogenic Isotope Ratios         |                                   |                                   |                        |                                  |                        |                                  |                        | Isotopic Dates (Ma) |                                   |                          |                                  |                          |                                  | Discordance (%) |                          |
|-----------------------------------------------------|--------------------------|---------|----------|-------|-----------------------------|--------------------|-----------------------------------|-----------------------------------|-----------------------------------|------------------------|----------------------------------|------------------------|----------------------------------|------------------------|---------------------|-----------------------------------|--------------------------|----------------------------------|--------------------------|----------------------------------|-----------------|--------------------------|
|                                                     | Wt. (mg)                 | U (ppm) | Pb (ppm) | Th U  | $\text{Pb}^*$ $\text{Pb}_c$ | $\text{Pb}_c$ (pg) | $^{206}\text{Pb}/^{204}\text{Pb}$ | $^{208}\text{Pb}/^{206}\text{Pb}$ | $^{207}\text{Pb}/^{206}\text{Pb}$ | $\pm$ (2 $\sigma$ , %) | $^{207}\text{Pb}/^{235}\text{U}$ | $\pm$ (2 $\sigma$ , %) | $^{206}\text{Pb}/^{238}\text{U}$ | $\pm$ (2 $\sigma$ , %) | $\rho$              | $^{207}\text{Pb}/^{206}\text{Pb}$ | $\pm$ (2 $\sigma$ , abs) | $^{207}\text{Pb}/^{235}\text{U}$ | $\pm$ (2 $\sigma$ , abs) | $^{206}\text{Pb}/^{238}\text{U}$ |                 | $\pm$ (2 $\sigma$ , abs) |
| (a)                                                 | (b)                      | (c)     | (c)      | (d)   | (e)                         | (e)                | (f)                               | (g)                               | (g)                               | (g)                    | (g)                              | (g)                    | (g)                              | (h)                    | (i)                 | (j)                               | (i)                      | (j)                              | (i)                      | (j)                              | (k)             |                          |
| <b>W1 (Anhée Nord: 50.3170°N, 4.8760°E, WGS 84)</b> |                          |         |          |       |                             |                    |                                   |                                   |                                   |                        |                                  |                        |                                  |                        |                     |                                   |                          |                                  |                          |                                  |                 |                          |
| W1/1                                                | [0.001]                  | 229     | 13.3     | 0.461 | 20.3                        | 0.62               | 1247                              | 0.146                             | 0.05304                           | 0.37                   | 0.3916                           | 0.40                   | 0.05355                          | 0.05                   | 0.584               | 330.7                             | 8.5                      | 335.55                           | 1.15                     | 336.25                           | 0.17            | -1.7                     |
| W1/3                                                | 0.0044                   | 142     | 8.2      | 0.507 | 37.5                        | 0.93               | 2265                              | 0.160                             | 0.05334                           | 0.18                   | 0.3937                           | 0.20                   | 0.05354                          | 0.04                   | 0.500               | 343.1                             | 4.2                      | 337.09                           | 0.57                     | 336.22                           | 0.12            | 2.0                      |
| W1/4                                                | 0.0041                   | 494     | 32.2     | 1.009 | 33.2                        | 3.87               | 1774                              | 0.318                             | 0.05328                           | 0.23                   | 0.3940                           | 0.25                   | 0.05363                          | 0.05                   | 0.488               | 340.8                             | 5.3                      | 337.28                           | 0.72                     | 336.77                           | 0.16            | 1.2                      |
| W1/5                                                | 0.0033                   | 290     | 16.5     | 0.508 | 51.6                        | 1.04               | 3109                              | 0.160                             | 0.05330                           | 0.13                   | 0.3932                           | 0.16                   | 0.05351                          | 0.08                   | 0.601               | 341.7                             | 3.0                      | 336.73                           | 0.47                     | 336.01                           | 0.28            | 1.7                      |
| W1/6                                                | 0.0044                   | 95      | 5.5      | 0.494 | 19.5                        | 1.18               | 1193                              | 0.156                             | 0.05332                           | 0.34                   | 0.3936                           | 0.37                   | 0.05354                          | 0.04                   | 0.639               | 342.3                             | 7.7                      | 337.00                           | 1.05                     | 336.23                           | 0.13            | 1.8                      |
| W1/7                                                | 0.0016                   | 447     | 25.5     | 0.507 | 46.5                        | 0.86               | 2807                              | 0.160                             | 0.05319                           | 0.15                   | 0.3927                           | 0.17                   | 0.05355                          | 0.04                   | 0.473               | 337.0                             | 3.4                      | 336.35                           | 0.47                     | 336.26                           | 0.13            | 0.2                      |
| W1/8                                                | 0.0025                   | 688     | 38.2     | 0.443 | 85.9                        | 1.10               | 5252                              | 0.140                             | 0.05320                           | 0.08                   | 0.3928                           | 0.10                   | 0.05355                          | 0.05                   | 0.574               | 337.4                             | 1.9                      | 336.43                           | 0.29                     | 336.29                           | 0.16            | 0.3                      |
| W1/9                                                | 0.0013                   | 523     | 31.7     | 0.702 | 29.3                        | 1.36               | 1686                              | 0.222                             | 0.05325                           | 0.24                   | 0.3930                           | 0.26                   | 0.05352                          | 0.05                   | 0.486               | 339.5                             | 5.5                      | 336.55                           | 0.75                     | 336.12                           | 0.17            | 1.0                      |
| <b>W8 (Anhée Nord: 50.3170°N, 4.8760°E, WGS 84)</b> |                          |         |          |       |                             |                    |                                   |                                   |                                   |                        |                                  |                        |                                  |                        |                     |                                   |                          |                                  |                          |                                  |                 |                          |
| W8/4                                                | 0.0022                   | 73      | 5.4      | 0.990 | 5.3                         | 1.89               | 301                               | 0.313                             | 0.05346                           | 1.40                   | 0.3938                           | 1.50                   | 0.05343                          | 0.11                   | 0.900               | 348.4                             | 31.8                     | 337.15                           | 4.31                     | 335.52                           | 0.36            | 3.7                      |
| W8/5                                                | 0.0009                   | 169     | 15.2     | 1.000 | 2.3                         | 4.10               | 143                               | 0.316                             | 0.05461                           | 3.13                   | 0.4048                           | 3.35                   | 0.05376                          | 0.22                   | 0.974               | 396.4                             | 70.2                     | 345.14                           | 9.79                     | 337.58                           | 0.73            | 14.8                     |
| W8/6                                                | [0.001]                  | 96      | 7.2      | 0.948 | 5.0                         | 1.20               | 287                               | 0.299                             | 0.05352                           | 1.59                   | 0.3951                           | 1.70                   | 0.05354                          | 0.14                   | 0.838               | 351.1                             | 35.9                     | 338.08                           | 4.90                     | 336.19                           | 0.45            | 4.2                      |
| W8/7                                                | 0.0018                   | 107     | 8.5      | 0.959 | 3.6                         | 3.35               | 210                               | 0.303                             | 0.05414                           | 2.02                   | 0.3988                           | 2.15                   | 0.05343                          | 0.15                   | 0.945               | 376.9                             | 45.3                     | 340.81                           | 6.24                     | 335.55                           | 0.48            | 11.0                     |
| W8/8                                                | 0.0019                   | 42      | 3.3      | 1.132 | 5.2                         | 1.01               | 286                               | 0.357                             | 0.05427                           | 1.55                   | 0.4007                           | 1.66                   | 0.05356                          | 0.13                   | 0.872               | 382.2                             | 34.8                     | 342.18                           | 4.82                     | 336.31                           | 0.41            | 12.0                     |
| W8/9                                                | 0.0010                   | 132     | 9.3      | 0.940 | 7.0                         | 1.17               | 392                               | 0.297                             | 0.05344                           | 1.06                   | 0.3938                           | 1.14                   | 0.05345                          | 0.08                   | 0.941               | 347.5                             | 24.0                     | 337.14                           | 3.27                     | 335.64                           | 0.27            | 3.4                      |
| W8/11                                               | [0.001]                  | 123     | 8.6      | 0.861 | 7.1                         | 1.06               | 405                               | 0.272                             | 0.05349                           | 1.06                   | 0.3953                           | 1.14                   | 0.05359                          | 0.09                   | 0.852               | 349.8                             | 24.1                     | 338.21                           | 3.27                     | 336.53                           | 0.29            | 3.8                      |
| W8/12                                               | [0.001]                  | 155     | 10.7     | 0.891 | 8.6                         | 1.11               | 486                               | 0.281                             | 0.05364                           | 0.88                   | 0.3961                           | 0.95                   | 0.05355                          | 0.08                   | 0.875               | 356.1                             | 20.0                     | 338.79                           | 2.75                     | 336.27                           | 0.26            | 5.6                      |
| W8/14                                               | 0.0020                   | 70      | 4.8      | 0.940 | 8.5                         | 1.02               | 475                               | 0.297                             | 0.05339                           | 0.88                   | 0.3943                           | 0.95                   | 0.05356                          | 0.07                   | 0.899               | 345.3                             | 20.0                     | 337.49                           | 2.72                     | 336.35                           | 0.23            | 2.6                      |

| Sample ID                                           | Wt.<br>(mg)   | Compositional Parameters |             |              |                        |                         | Radiogenic Isotope Ratios                 |                                           |                                           |                           |                                          |                           |                                          | $\rho$      | Isotopic Dates (Ma)       |                                           |                             |                                          |                             | Discordance<br>(%) |                                          |                             |
|-----------------------------------------------------|---------------|--------------------------|-------------|--------------|------------------------|-------------------------|-------------------------------------------|-------------------------------------------|-------------------------------------------|---------------------------|------------------------------------------|---------------------------|------------------------------------------|-------------|---------------------------|-------------------------------------------|-----------------------------|------------------------------------------|-----------------------------|--------------------|------------------------------------------|-----------------------------|
|                                                     |               | U<br>(ppm)               | Pb<br>(ppm) | Th<br>U      | Pb*<br>Pb <sub>c</sub> | Pb <sub>c</sub><br>(pg) | $\frac{^{206}\text{Pb}}{^{204}\text{Pb}}$ | $\frac{^{208}\text{Pb}}{^{206}\text{Pb}}$ | $\frac{^{207}\text{Pb}}{^{206}\text{Pb}}$ | $\pm$<br>(2 $\sigma$ , %) | $\frac{^{207}\text{Pb}}{^{235}\text{U}}$ | $\pm$<br>(2 $\sigma$ , %) | $\frac{^{206}\text{Pb}}{^{238}\text{U}}$ |             | $\pm$<br>(2 $\sigma$ , %) | $\frac{^{207}\text{Pb}}{^{206}\text{Pb}}$ | $\pm$<br>(2 $\sigma$ , abs) | $\frac{^{207}\text{Pb}}{^{235}\text{U}}$ | $\pm$<br>(2 $\sigma$ , abs) |                    | $\frac{^{206}\text{Pb}}{^{238}\text{U}}$ | $\pm$<br>(2 $\sigma$ , abs) |
| (a)                                                 | (b)           | (c)                      | (c)         | (d)          | (e)                    | (e)                     | (f)                                       | (g)                                       | (g)                                       | (g)                       | (g)                                      | (g)                       | (g)                                      | (h)         | (i)                       | (j)                                       | (i)                         | (j)                                      | (i)                         | (j)                | (k)                                      |                             |
| <b>W12 (Anhée Sud: 50.2940°N, 4.8936°E, WGS 84)</b> |               |                          |             |              |                        |                         |                                           |                                           |                                           |                           |                                          |                           |                                          |             |                           |                                           |                             |                                          |                             |                    |                                          |                             |
| W12/2                                               | [0.001]       | 265                      | 18.8        | 0.700        | 4.6                    | 3.36                    | 280                                       | 0.221                                     | 0.05336                                   | 1.51                      | 0.3902                                   | 1.61                      | 0.05304                                  | 0.12        | 0.869                     | 344.0                                     | 34.1                        | 334.55                                   | 4.59                        | 333.18             | 0.39                                     | 3.2                         |
| W12/3                                               | 0.0020        | 439                      | 27.6        | 0.839        | 21.5                   | 2.45                    | 1205                                      | 0.265                                     | 0.05319                                   | 0.34                      | 0.3882                                   | 0.36                      | 0.05293                                  | 0.04        | 0.631                     | 337.1                                     | 7.6                         | 333.05                                   | 1.03                        | 332.47             | 0.13                                     | 1.4                         |
| W12/4                                               | [0.001]       | 257                      | 16.5        | 0.654        | 8.3                    | 1.77                    | 496                                       | 0.206                                     | 0.05337                                   | 0.84                      | 0.3882                                   | 0.90                      | 0.05275                                  | 0.07        | 0.798                     | 344.7                                     | 19.1                        | 333.02                                   | 2.56                        | 331.36             | 0.24                                     | 3.9                         |
| W12/5                                               | [0.001]       | 386                      | 26.0        | 0.668        | 6.0                    | 3.71                    | 364                                       | 0.211                                     | 0.05337                                   | 1.15                      | 0.3897                                   | 1.22                      | 0.05296                                  | 0.09        | 0.867                     | 344.7                                     | 25.9                        | 334.17                                   | 3.48                        | 332.66             | 0.30                                     | 3.5                         |
| W12/6                                               | 0.0024        | 143                      | 9.3         | 0.696        | 8.4                    | 2.37                    | 499                                       | 0.220                                     | 0.05333                                   | 0.85                      | 0.3892                                   | 0.91                      | 0.05294                                  | 0.08        | 0.743                     | 342.8                                     | 19.2                        | 333.81                                   | 2.59                        | 332.52             | 0.27                                     | 3.0                         |
| W12/7                                               | 0.0009        | 550                      | 36.7        | 1.105        | 22.7                   | 1.40                    | 1192                                      | 0.349                                     | 0.05318                                   | 0.34                      | 0.3884                                   | 0.37                      | 0.05297                                  | 0.05        | 0.586                     | 336.4                                     | 7.7                         | 333.18                                   | 1.04                        | 332.71             | 0.15                                     | 1.1                         |
| W12/8                                               | 0.0014        | 412                      | 24.6        | 0.626        | 19.8                   | 1.65                    | 1169                                      | 0.198                                     | 0.05329                                   | 0.37                      | 0.3877                                   | 0.40                      | 0.05276                                  | 0.08        | 0.490                     | 341.3                                     | 8.3                         | 332.66                                   | 1.13                        | 331.43             | 0.25                                     | 2.9                         |
| W12/9                                               | 0.0009        | 367                      | 25.9        | 0.731        | 4.8                    | 4.00                    | 291                                       | 0.231                                     | 0.05346                                   | 1.44                      | 0.3897                                   | 1.54                      | 0.05287                                  | 0.11        | 0.880                     | 348.3                                     | 32.6                        | 334.16                                   | 4.39                        | 332.13             | 0.37                                     | 4.6                         |
| W12/11                                              | 0.0015        | 84                       | 5.7         | 0.723        | 6.5                    | 1.14                    | 384                                       | 0.228                                     | 0.05373                                   | 1.15                      | 0.3927                                   | 1.23                      | 0.05301                                  | 0.11        | 0.714                     | 359.9                                     | 25.9                        | 336.37                                   | 3.51                        | 332.98             | 0.36                                     | 7.5                         |
| W12/12                                              | [0.001]       | 166                      | 11.8        | 0.763        | 4.7                    | 2.06                    | 284                                       | 0.241                                     | 0.05353                                   | 1.50                      | 0.3912                                   | 1.61                      | 0.05300                                  | 0.12        | 0.837                     | 351.4                                     | 34.0                        | 335.24                                   | 4.58                        | 332.91             | 0.40                                     | 5.3                         |
| W12/13                                              | 0.0021        | 383                      | 22.5        | 0.623        | 28.8                   | 1.59                    | 1696                                      | 0.197                                     | 0.05315                                   | 0.20                      | 0.3876                                   | 0.23                      | 0.05289                                  | 0.05        | 0.664                     | 335.3                                     | 4.6                         | 332.61                                   | 0.66                        | 332.22             | 0.16                                     | 0.9                         |
| W12/14                                              | 0.0040        | 72                       | 4.7         | 0.787        | 10.6                   | 1.62                    | 611                                       | 0.248                                     | 0.05337                                   | 0.67                      | 0.3898                                   | 0.71                      | 0.05297                                  | 0.06        | 0.884                     | 344.6                                     | 15.1                        | 334.22                                   | 2.03                        | 332.73             | 0.18                                     | 3.4                         |
| W12/15                                              | 0.0009        | 217                      | 15.5        | 0.825        | 5.1                    | 2.27                    | 303                                       | 0.260                                     | 0.05361                                   | 1.44                      | 0.3921                                   | 1.54                      | 0.05304                                  | 0.12        | 0.816                     | 354.8                                     | 32.5                        | 335.91                                   | 4.40                        | 333.18             | 0.40                                     | 6.1                         |
| W12/16                                              | 0.0024        | 171                      | 10.1        | 0.684        | 45.1                   | 0.53                    | 2600                                      | 0.216                                     | 0.05322                                   | 0.15                      | 0.3885                                   | 0.17                      | 0.05294                                  | 0.05        | 0.660                     | 338.3                                     | 3.3                         | 333.26                                   | 0.49                        | 332.54             | 0.15                                     | 1.7                         |
| W12/17                                              | 0.0025        | 164                      | 9.7         | 0.705        | 40.2                   | 0.59                    | 2307                                      | 0.223                                     | 0.05322                                   | 0.17                      | 0.3879                                   | 0.19                      | 0.05287                                  | 0.03        | 0.617                     | 338.1                                     | 3.9                         | 332.86                                   | 0.54                        | 332.11             | 0.10                                     | 1.8                         |
| <b>W13 (Anhée Sud: 50.2940°N, 4.8936°E, WGS 84)</b> |               |                          |             |              |                        |                         |                                           |                                           |                                           |                           |                                          |                           |                                          |             |                           |                                           |                             |                                          |                             |                    |                                          |                             |
| W13/1                                               | <b>0.0156</b> | <b>138</b>               | <b>8.2</b>  | <b>0.711</b> | <b>46.1</b>            | <b>2.72</b>             | <b>2639</b>                               | <b>0.224</b>                              | <b>0.05312</b>                            | <b>0.14</b>               | <b>0.3875</b>                            | <b>0.16</b>               | <b>0.05292</b>                           | <b>0.04</b> | <b>0.516</b>              | <b>333.7</b>                              | <b>3.3</b>                  | <b>332.57</b>                            | <b>0.46</b>                 | <b>332.41</b>      | <b>0.14</b>                              | <b>0.4</b>                  |
| W13/2                                               | <b>0.0130</b> | <b>77</b>                | <b>4.6</b>  | <b>0.702</b> | <b>40.1</b>            | <b>1.45</b>             | <b>2306</b>                               | <b>0.222</b>                              | <b>0.05308</b>                            | <b>0.24</b>               | <b>0.3872</b>                            | <b>0.26</b>               | <b>0.05291</b>                           | <b>0.06</b> | <b>0.346</b>              | <b>332.1</b>                              | <b>5.5</b>                  | <b>332.32</b>                            | <b>0.73</b>                 | <b>332.35</b>      | <b>0.19</b>                              | <b>-0.1</b>                 |
| W13/3                                               | 0.0116        | 35                       | 2.0         | 0.627        | 30.4                   | 0.76                    | 1781                                      | 0.198                                     | 0.05318                                   | 0.18                      | 0.3889                                   | 0.22                      | 0.05304                                  | 0.05        | 0.847                     | 336.4                                     | 4.0                         | 333.58                                   | 0.62                        | 333.17             | 0.17                                     | 1.0                         |
| W13/4                                               | <b>0.0110</b> | <b>27</b>                | <b>2.0</b>  | <b>0.678</b> | <b>4.0</b>             | <b>4.33</b>             | <b>246</b>                                | <b>0.214</b>                              | <b>0.05364</b>                            | <b>1.71</b>               | <b>0.3917</b>                            | <b>1.83</b>               | <b>0.05297</b>                           | <b>0.12</b> | <b>0.975</b>              | <b>356.0</b>                              | <b>38.6</b>                 | <b>335.64</b>                            | <b>5.23</b>                 | <b>332.71</b>      | <b>0.39</b>                              | <b>6.5</b>                  |
| W13/5                                               | <b>0.0099</b> | <b>19</b>                | <b>1.3</b>  | <b>0.896</b> | <b>9.1</b>             | <b>1.28</b>             | <b>511</b>                                | <b>0.283</b>                              | <b>0.05318</b>                            | <b>0.88</b>               | <b>0.3884</b>                            | <b>0.94</b>               | <b>0.05297</b>                           | <b>0.08</b> | <b>0.790</b>              | <b>336.3</b>                              | <b>19.9</b>                 | <b>333.19</b>                            | <b>2.68</b>                 | <b>332.74</b>      | <b>0.27</b>                              | <b>1.1</b>                  |
| W13/6                                               | <b>0.0112</b> | <b>62</b>                | <b>3.6</b>  | <b>0.664</b> | <b>48.3</b>            | <b>0.82</b>             | <b>2797</b>                               | <b>0.210</b>                              | <b>0.05317</b>                            | <b>0.12</b>               | <b>0.3881</b>                            | <b>0.14</b>               | <b>0.05294</b>                           | <b>0.03</b> | <b>0.640</b>              | <b>335.8</b>                              | <b>2.8</b>                  | <b>332.97</b>                            | <b>0.41</b>                 | <b>332.56</b>      | <b>0.11</b>                              | <b>1.0</b>                  |

## References

- Crowley, J., Schoene, B. & Bowring, S. 2007. U-Pb dating of zircon in the Bishop Tuff at the millennial scale. *Geology*, **35**, 1123-1126, DOI: 10.1130/G24017A.1.
- Jaffey, A. H., Flynn, K. F., Glendenin, L. E., Bentley, W. C. & Essling, A. M. 1971. Precision measurement of half-lives and specific activities of  $^{235}\text{U}$  and  $^{238}\text{U}$ . *Physical Review C*, **4**, 1889-1906, DOI: 10.1103/PhysRevC.4.1889.
- Mattinson, J. M. 2005. Zircon U/Pb chemical abrasion (CA-TIMS) method: Combined annealing and multi-step partial dissolution analysis for improved precision and accuracy of zircon ages. *Chemical Geology*, **220**, 47-66, DOI: 10.1016/j.chemgeo.2005.03.011.
- Schmitz, M. D. & Schoene, B. 2007. Derivation of isotope ratios, errors, and error correlations for U-Pb geochronology using  $^{205}\text{Pb}$ - $^{235}\text{U}$ -( $^{233}\text{U}$ )-spiked isotope dilution thermal ionization mass spectrometric data. *Geochemistry, Geophysics, Geosystems*, **8**, 20pp, DOI: 10.1029/2006GC001492.
